# Supplementary material for: Revealing Genetic Diversity, Population Structure and Cultivar-Specific SSR Alleles in Pistachio Using SSR Markers
Source: Research Square preprint supplement (doi:10.21203/rs.3.rs-1104578/v1), 2021-12-13
Supplement: Supplementary file 1 [file 8a3fb919467244707bcfafa0.xlsx]

## Sheet: Supplementary Table-1
Supplementary Table 1. Sequences of 92 SSR loci developed from Pistacia vera L.
No	SSR loci	Sequence (5′–3′)	Sequence (5′–3′)
1	CUPSiOh2424	F:TGAATTGGAATTTGGAAGTAATCTC	R:TGTTTGACACGCAACATAGCA
2	CUPSiOh1097	F:TTTTTGGTGACAGAAAGTTGT	R:CGACAAAGAGAGGGAACAGTG
3	CUPSiOh1163	F:CCAGGTTGTTTCAGGTTCATT	R:TAGAATTAGTGCGCTGGGACA
4	CUPSiOh1613	F:TCCCATCTGACTACCCAATGA	R:CCCATTGCCCATCTTTCTATT
5	CUPSiOh1818	F:TCACTAAAAGGGCAATTTATTACG	R:CCCATTGACCTTTCTTCCTCT
6	CUPSiOh1913	F:CGCTTTCATTGTTTCTGGGTTA	R:CTCCTCAAGGCCAAGATTCA
7	CUPSiOh1938	F:CCATTTAATGAGTGCATTTCCA	R:GGAAAGGCAGATGTGAATCAG
8	CUPSiOh196	F:TTCTCCCTTCTCCCTTGTCTC	R:ATGGGGAGAAATTCCTGAGAA
9	CUPSiOh2079	F:TGTGTTTGACACGACAAAAGG	R:TACCCATAAGCCAATCCTTCC
10	CUPSiOh216	F:GCCATCTTTCCTTGTTTAAAAGTC	R:ATTAGTCAGAAGGGCCCCAGT
11	CUPSiOh2311	F:TTTCATCCTTGTCAAACCATTG	R:TTTCGCCTTCTAAGTCGTTCTT
12	CUPSiOh2460	F:CACTAAAGTTAGACATGACAAAACAA	R:AAAGAGGCCTAAATGGTCAAA
13	CUPSiOh2635	F:TGCCATTATGGTGTTCATCTTC	R:TTGATGAGAAAACATGGAAAGC
14	CUPSiOh2679	F:AAGGATATGAAGGTGTTAATTGTGC	R:CATGCAATACAAATATAATTCACTCG
15	CUPSiOh2834	F:GCGCTGTAAATCCAAGAAAAC	R:TGTTCGTTGTTGCCTTTCTTT
16	CUPSiOh2951	F:AGTTGAGTTGAGGGCAGGGTA	R:TGAGCATTATTGAAATAGCAGCA
17	CUPSiOh2985	F:GAAAGAGATTTTTGAAAGCATCTGA	R:CGTAACCCTACTGAGGACAGG
18	CUPSiOh3328	F:GAATATCATGAAATGATTGTGG	R:CATTGCTTTCAAACAAAGATGAA
19	CUPSiOh3348	F:CCCCCAACCTAAAATCAACAT	R:ATGCAACAAGTTGGTGATCGT
20	CUPSiOh3593	F:GGTGAAATAACGAAACAAACG	R:CCACAATCCAGTTAGCCAAAA
21	CUPSiOh3646	F:ATACACCCGTGTGAAATGCAA	R:GGCTGGTAGTCTGGTGCTTT
22	CUPSiOh3660	F:CCATCTAGTTCACCACCTGAAA	R:GGGATGTAGGATGACCTGCTT
23	CUPSiOh3668	F:CCAAAGCCAGGTACAAAGAAGAGA	R:TTCAATCTTTTCAGAGCCTCAACC
24	CUPSiOh3822	F:CCAAGGAGCTCTCTCCTTTTA	R:TTTCCATTTAACGCCAGTAAAGA
25	CUPSiOh3876	F:CCTATTTCCCCTTACTTCTTCCA	R:TCAAACCTTAGTGAAGGGCATT
26	CUPSiOh3920	F:GAAGGGAAGGAGAGAACGATG	R:GAAAAACAACAAAGCGACGAC
27	CUPSiOh4004	F:TGGGGCTAAAAATCACTTCAC	R:TTGCAAAATGAGTTTGGAGGT
28	CUPSiOh4055	F:CTTGAAAATTGTTTTGCAGT	R:CAGACTGAAAGTTTAAGATTGA
29	CUPSiOh4057	F:TGCATAAGGAATTTAATCCTCCA	R:TGCTAGAATGTGTTTTTCATTCA
30	CUPSiOh4074	F:CAAAGGCACTGAAACGTTAAGA	R:CATTGCACACATGACTCATCA
31	CUPSiOh4084	F:ATGAGGTCAGGTCACGTTCAG	R:TGCCCCAATTTATCCCACTAT
32	CUPSiOh4341	F:GAAATATTAAGGGAATGACCAAAATGC	R:TTGAAGTCTGCTTTGAATCCATTG
33	CUPSiOh527	F:TGCTATCACAAATAGTCAAAAAGC	R:TCGATAGCTCATTGGTCATCC
34	CUPSiOh810	F:CCCGTCATATTTTGAGAGTTGA	R:CCATTTTTCTCCACCATGTTC
35	CUPSiPa1215	F:TCCTTTCAAAGCAATTGTTTCTCC	R:TTTGGTGAACCCTTGTTTTCTTGT
36	CUPSiPa1583	F:GAGAAGTAAAAGAAGGGACGGTTA	R:TTTCTTCCATAATCAATCCGACT
37	CUPSiPa1937	F:CAGAAACAAGTGAGTCCACACAA	R:CAGTCTTGGGAGAGATTGTTGA
38	CUPSiPa2132	F:GAGCTTGTGCTGCATTGTTTA	R:CTTTTAACTGGACCCCACGAT
39	CUPSiPa3096	F:ATCGGCTTCCAGGTATTTCAA	R:AGCTGCAAAAACAATCAAACC
40	CUPSiPa3520	F:CGTCTCTATATCATGCAATGCAAA	R:ATGATGATCTCGCGGTGAAC
41	CUPSiPa3929	F:TTGCAGTCAATGGAATAATGG	R:CCATACCACATTAAAAGTTCTTTCC
42	CUPSiPa4715	F:TGGACCCTGTTGTTCTTACTCC	R:TGGAGGGAAACTTGAAGCTAA
43	CUPSiPa694	F:TGTTGTATGCAATACCCTAGATT	R:TCATGTGTATTCATTGGTCGAT
44	CUPSiPa912	F:TGCAGTGAGTAGGAAGTTTGGA	R:AGCGAACAAGAGAACGAACAC
45	CUPOhBa1592	F:TTGTGCTAAGACAAAGGTAAGGTG	R:TGATAGCCTTGGTTTTTAGGC
46	CUPOhBa3951	F:TTGGAAAAGCTGAAGTTGCAT	R:AAAACTTCACGGAATTGTGTTTT
47	CUPOhBa4461	F:CAAAACGTTGATGGACTCTGA	R:TTTGCATCATCAGTGCAGAAG
48	CUPOhPa1527	F:AGCCAAATTGAACATCATTGC	R:GCTCACGCTTTTACTAACTTCG
49	CUPOhPa3361	F:TTCAACATCACTGCAAGAAATAACA	R:GGAAATAAATGTACAGACAAATTTCCA
50	CUPOhPa995	F:GGAGCAGAGGCAATAATCTTGT	R:GAACAAATGCACAAAGGGGTA
51	CUPBaPa1355	F:CAGGAATCAACAAGCTACAACAA	R:GCAGGACCAACATAAACTTTGC
52	CUPBaPa1690	F:CGATCCGCACTCTCTTATCACAT	R:ACCAACTCAACACTTGTTTGGTGA
53	CUPBaPa2540	F:TCGATCAAAGAAAACAAAAGTTG	R:GCTTCCAATGCTAACGATGAT
54	CUPBaPa394	F:TAGCCGATAAAGAAAGGGTTG	R:CATGTGTCTGCGTGTGTATGT
55	CUPBaPa667	F:GGCTGCCCCCATTTATTATT	R:GGAAAGGTCAAGAAATGGAAGA
56	CUPBaPa992	F:CGCAAAGAGTTTTTCAAAGAGG	R:TGGTTTCAAATACCGAAAAACA
57	CUPSiBa1265	F:ATACCCTTGCCTTGTTCCTTCTTC	R:AAAGTCCACCCAGGTGGTTAAAAG
58	CUPSiBa1131	F:TGGAGCTCTAGAGGGTAGGAGTTTT	R:CACCTTCTTGTTCTTCCTAAACTAAACC
59	CUPSiBa613	F:GTCCTGCATCTGTTTCACTCATTG	R:CAGGCCTGTGAGCAATCAATTT
60	CUPSiBa4598	F:TGAGTGTTGACACACAAATGTTCG	R:ATATGGCCTCAAAGCCAACAAAA
61	CUPSiBa3976	F:TAGGGGATCCATCAAACACTTAGC	R:AGTGGAGACATTGAGGTACTTGCC
62	CUPSiBa1817	F:ACTTTGTTGTTGCGGTGTTTTAGC	R:TGACAGAGGCTTTTATTGAATTACCC
63	CUPBaPa1791	F:TTGTTGCATTGATATTCCAAAGT	R:TGGAGTGAAGCATTTGTATTTGA
64	CUPSiOh2390	F:AAAACGCCCTTTCTCTTCTTC	R:TTGGTGATTTTGAAGGGGAAT
65	CUPSiOh4570	F:AAAATCAAGAAGCAAGAGTTCTCA	R:CTATATTTAATCGGATTGTTTGC
66	CUPSiPa3487	F:TGAGAGTCGTGTAAGGGCTTC	R:CTGTTTAAGGAACGGAAAGG
67	CUPSiOh159	F:GTTCGAGGGAATGTGAGTGAA	R:TGGTCACTCCATCTCCTTCTG
68	CUPOhBa2127	F:TGGAAGAACAAGTGAGGAGCA	R:GTTGAGGAAGGAATGGAGGTC
69	CUPSiOh2178	F:CCAGAATTTGTTGGAAGTTGC	R:TTATCTCACATGAGGCAAAAT
70	CUPSiBa3919	F:TGAAATTCTCCAACGTAGCGGT	R:AGATCCAATTGAATTACGGGATCA
71	CUPOhPa2500	F:CATTGATATCAGCACGACCTGTTC	R:TTTCAACAACCATATCCAAACTTAAACA
72	CUPSiBa4207	F:ATTTGTTCGTTTAATGCAGGGAAA	R:CAAAATCGTTCTTGGTGTTTGTGA
73	CUPSiBa2591	F:GAAATTCTTACAAATAATCCCAAGAAAA	R:ATTTAACGGAAGGAGAAGATTTGC
74	CUPSiBa3914	F:TTTGTATTGCCTGTTGTGCTTTTT	R:GGTCCATCCATCAACAAACTTTTC
75	CUPVEST1013	F:GTTTCATACACCATGCAACTTCA	R:GTCGTTAAGGAAGAGGAGGTGAT
76	CUPVEST1424	F:TTAATGCTCAAAGAAAAGAAGCG	R:ATGCTTTGAATTTGATTGTCCAG
77	CUPVEST1747	F:ATACTAAAAAGGGCAGACCATCG	R:GGAATAAATAGGCGACCTTCATC
78	CUPVEST1852	F:CTCTCAGCCTTCATGTAATCCAC	R:AGTTTTTCAGGTGAGGAAAAAGG
79	CUPVEST2139	F:TGAAATTTTGACGAGAGGAGAAG	R:GCTGAAGACGAAGACGAAGATAA
80	CUPVEST2697	F:TGGAATTAGGGTTTTGTCGAGTA	R:GGTCCCTCAAACAACAACAATTA
81	CUPVEST2736	F:AGAAGCAGCAGTTAAAGGAAGGT	R:TGTGCTTGCATCATATGCTAAAT
82	CUPVEST2789	F:ACACAAACACAATCCCTTGAAAT	R:TAGTGAGGCCAAACAGATACAGG
83	CUPVEST2878	F:GTAATACCATCGCCAAAAAGTGA	R:GGACGAAATCTATGCTGAAGTTG
84	CUPVEST2939	F:CACAGTTTTAGCTTGTCTTTGCC	R:CTCCAGCTCCACCGAAATC
85	CUPVEST3063	F:CTCTCTTTACAAACCCAGAACCA	R:GTTTTCGAATGTTTCATTTTTGG
86	CUPVEST3504	F:GATAATACGAATGGTACTGTCAATAA	R:CTTTTTCCTCTTCCAATTCCAAC
87	CUPVEST4634	F:GTCTTCAGCCATTTCTTCCTCAT	R:TTCACTTGACAAAAGTGTGGTTG
88	CUPVEST5301b	F:CATTATGGGTACAGACACAGCAA	R:CATTATGGGTACAGACACAGCAA
89	CUPVEST5880	F:AGGCGTGAATCTAACACATCAAT	R:AGTTTTGGAGTAGTGGCACTTGA
90	CUPVEST704	F:ATTTGCGTTTTGACTGTTTTTGT	R:AAGTGATGAGTTCTACCAGGGGT
91	CUPVEST8104	F:AGTGATCAAGCTAATGAGGGTCA	R:CCTTTCTCTAAATCCATCCATGA
92	CUPVEST910	F:AGTGAAATATGAACATACCCGGA	R:TCAAAGACCTAAGGGGTTTCTTC

## Sheet: Supplementary Table-2
Supplementary Table 2. Genetic dissimilarites of pistachio cultivars.
OTU	12-2	14-107	16-20	16-32	1-76	19-112	21-125	21-130	23-102	25-90	9-64	Aeginea	Ajamy	Ashoury	Atli	Bagyolu	BeyazBen	Bilgen	Cakmak	Degirmi	Gialla	Haciserifi	Halebi	Kalehghouchi	Kaska	KermanSPA	KermanUSA	KetenGomlek	Kirmizi	M3	M7	Male-13	Male-22	Male-23	Male-7	Mumtaz	Ohadi	Peters	RedAleppo	Sefidi	Selection-10	Selection-11	Selection-12	Selection-13	Selection-14	Selection-15	Selection-16	Selection-2	Selection-3
12-2		0.529851	0.506667	0.555556	0.603448	0.517442	0.5	0.455696	0.540698	0.472973	0.380952	0.565934	0.561798	0.633333	0.703488	0.714286	0.572222	0.590909	0.55	0.522222	0.595506	0.588889	0.633333	0.588889	0.65	0.533708	0.482143	0.582418	0.591954	0.619318	0.617284	0.561798	0.582353	0.5125	0.527778	0.52809	0.568182	0.570588	0.533708	0.386905	0.576923	0.566667	0.482759	0.631868	0.578652	0.605882	0.477528	0.527473	0.576923
14-107	0.529851		0.309524	0.344828	0.52439	0.462121	0.333333	0.408333	0.476923	0.554688	0.435484	0.589552	0.592308	0.598485	0.707692	0.708955	0.552239	0.423077	0.55303	0.545455	0.613636	0.425373	0.613636	0.393939	0.586207	0.431818	0.338462	0.544776	0.575758	0.640625	0.644068	0.641791	0.611111	0.40678	0.373134	0.5	0.416667	0.53125	0.592308	0.507812	0.552239	0.598485	0.538462	0.589552	0.424242	0.561538	0.507692	0.507463	0.544776
16-20	0.506667	0.309524		0.289062	0.520408	0.439189	0.323944	0.345588	0.444444	0.592308	0.366197	0.6	0.587838	0.655405	0.712329	0.713333	0.586667	0.390411	0.587838	0.601351	0.641892	0.42	0.648649	0.406667	0.626866	0.506667	0.427536	0.593333	0.609589	0.666667	0.673913	0.66	0.647887	0.395522	0.386667	0.424658	0.356164	0.564286	0.621622	0.514493	0.573333	0.628378	0.527778	0.633333	0.376712	0.618056	0.554054	0.54	0.533333
16-32	0.555556	0.344828	0.289062		0.47	0.521739	0.352113	0.4	0.457746	0.629032	0.428571	0.678082	0.584507	0.671233	0.727941	0.712329	0.611111	0.4	0.666667	0.631944	0.694444	0.416667	0.673611	0.444444	0.619048	0.486111	0.449275	0.623288	0.607143	0.715278	0.731343	0.638889	0.642857	0.484848	0.4375	0.492958	0.366197	0.594203	0.690141	0.604478	0.623288	0.664384	0.594203	0.657534	0.450704	0.619403	0.590278	0.582192	0.582192
1-76	0.603448	0.52439	0.520408	0.47		0.491228	0.535714	0.509259	0.482456	0.478261	0.583333	0.567797	0.568966	0.594828	0.464912	0.474576	0.533898	0.550847	0.594828	0.567797	0.627119	0.559322	0.586207	0.491525	0.560345	0.594828	0.590909	0.542373	0.570175	0.706897	0.718182	0.627119	0.649123	0.588235	0.570175	0.577586	0.516949	0.705357	0.627119	0.556604	0.533898	0.59322	0.535714	0.567797	0.447368	0.583333	0.561404	0.584746	0.601695
19-112	0.517442	0.462121	0.439189	0.521739	0.491228		0.474684	0.434211	0.46988	0.605634	0.43125	0.597701	0.623529	0.639535	0.704819	0.718391	0.591954	0.511765	0.622093	0.587209	0.633721	0.511494	0.633721	0.476744	0.642857	0.534884	0.481481	0.591954	0.582353	0.690476	0.724359	0.686047	0.689024	0.423077	0.441176	0.505814	0.517647	0.58642	0.658824	0.561728	0.568966	0.627907	0.559524	0.632184	0.452941	0.640244	0.535294	0.545977	0.557471
21-125	0.5	0.333333	0.323944	0.352113	0.535714	0.474684		0.168919	0.411392	0.586957	0.2625	0.60241	0.611111	0.634146	0.689873	0.680723	0.584337	0.419753	0.585366	0.615854	0.646341	0.409639	0.640244	0.408537	0.608108	0.52439	0.435065	0.584337	0.59375	0.660494	0.675325	0.614458	0.604938	0.388889	0.341463	0.5	0.277778	0.583333	0.592593	0.539474	0.572289	0.609756	0.56875	0.644578	0.376543	0.589744	0.560976	0.566265	0.584337
21-130	0.455696	0.408333	0.345588	0.4	0.509259	0.434211	0.168919		0.435065	0.560606	0.276316	0.6125	0.615385	0.632911	0.688312	0.69375	0.582278	0.423077	0.594937	0.613924	0.641026	0.424051	0.639241	0.4125	0.601449	0.51875	0.526667	0.59375	0.596154	0.636364	0.65493	0.628205	0.62	0.427536	0.352564	0.442308	0.335443	0.547297	0.588608	0.533333	0.58125	0.613924	0.572368	0.63125	0.373418	0.646667	0.575949	0.56875	0.58125
23-102	0.540698	0.476923	0.444444	0.457746	0.482456	0.46988	0.411392	0.435065		0.570423	0.487805	0.425287	0.476471	0.557471	0.60241	0.614943	0.413793	0.470588	0.505814	0.52907	0.517442	0.482759	0.540698	0.406977	0.551948	0.452941	0.493827	0.425287	0.422619	0.571429	0.583333	0.651163	0.638554	0.493421	0.505882	0.511765	0.458333	0.52439	0.505882	0.5125	0.408046	0.436047	0.47619	0.54023	0.376471	0.425926	0.517647	0.482759	0.482759
25-90	0.472973	0.554688	0.592308	0.629032	0.478261	0.605634	0.586957	0.560606	0.570423		0.585714	0.5	0.547945	0.621622	0.527397	0.566667	0.527027	0.659722	0.5	0.527027	0.589041	0.641892	0.601351	0.635135	0.606061	0.623288	0.635714	0.526667	0.582192	0.604167	0.576923	0.635135	0.647887	0.653846	0.616438	0.59589	0.673611	0.65	0.534247	0.373239	0.546667	0.574324	0.333333	0.6	0.641892	0.578571	0.438356	0.54	0.58
9-64	0.380952	0.435484	0.366197	0.428571	0.583333	0.43125	0.2625	0.276316	0.487805	0.585714		0.647059	0.650602	0.682353	0.72561	0.723529	0.595238	0.481707	0.607143	0.636905	0.674699	0.482143	0.714286	0.464286	0.593333	0.494048	0.423077	0.6	0.603659	0.689024	0.692308	0.614458	0.608434	0.414474	0.369048	0.475904	0.335366	0.582278	0.626506	0.538462	0.6	0.625	0.555556	0.705882	0.445783	0.651899	0.529762	0.523529	0.6
Aeginea	0.565934	0.589552	0.6	0.678082	0.567797	0.597701	0.60241	0.6125	0.425287	0.5	0.647059		0.438889	0.461538	0.528736	0.532609	0.296703	0.634831	0.357143	0.406593	0.427778	0.631868	0.450549	0.648352	0.537037	0.572222	0.635294	0.309783	0.238636	0.466292	0.463415	0.705556	0.69186	0.65	0.672222	0.616667	0.668539	0.598837	0.416667	0.547059	0.293478	0.340659	0.340909	0.440217	0.633333	0.282353	0.505556	0.521739	0.527174
Ajamy	0.561798	0.592308	0.587838	0.584507	0.568966	0.623529	0.611111	0.615385	0.476471	0.547945	0.650602	0.438889		0.432584	0.569767	0.588889	0.359551	0.62069	0.41573	0.44382	0.420455	0.629213	0.421348	0.646067	0.56875	0.5625	0.638554	0.35	0.436047	0.436782	0.432099	0.693182	0.702381	0.621795	0.647727	0.579545	0.66092	0.582353	0.386364	0.512048	0.372222	0.348315	0.5	0.4	0.636364	0.433735	0.438202	0.533333	0.511111
Ashoury	0.633333	0.598485	0.655405	0.671233	0.594828	0.639535	0.634146	0.632911	0.557471	0.621622	0.682353	0.461538	0.432584		0.622093	0.648352	0.461111	0.659091	0.511111	0.361111	0.382022	0.666667	0.161111	0.688889	0.64375	0.595506	0.660714	0.472527	0.471264	0.477273	0.481481	0.696629	0.709302	0.65	0.662921	0.651685	0.670455	0.570588	0.44382	0.577381	0.450549	0.394444	0.586207	0.186813	0.674157	0.446429	0.516854	0.554945	0.489011
Atli	0.703488	0.707692	0.712329	0.727941	0.464912	0.704819	0.689873	0.688312	0.60241	0.527397	0.72561	0.528736	0.569767	0.622093		0.0402299	0.459302	0.732143	0.534884	0.598837	0.6	0.726744	0.622093	0.726744	0.262821	0.674419	0.731707	0.477011	0.548193	0.619048	0.621795	0.758824	0.762195	0.733333	0.729412	0.711765	0.729412	0.685185	0.547059	0.685185	0.465517	0.517442	0.60241	0.62069	0.735294	0.560976	0.664706	0.683908	0.712644
Bagyolu	0.714286	0.708955	0.713333	0.712329	0.474576	0.718391	0.680723	0.69375	0.614943	0.566667	0.723529	0.532609	0.588889	0.648352	0.0402299		0.467033	0.730337	0.543956	0.620879	0.622222	0.725275	0.642857	0.730769	0.228395	0.688889	0.747059	0.478261	0.556818	0.61236	0.621951	0.755556	0.744186	0.7375	0.744444	0.722222	0.730337	0.69186	0.577778	0.711765	0.467391	0.527473	0.607955	0.641304	0.738889	0.564706	0.677778	0.684783	0.717391
BeyazBen	0.572222	0.552239	0.586667	0.611111	0.533898	0.591954	0.584337	0.582278	0.413793	0.527027	0.595238	0.296703	0.359551	0.461111	0.459302	0.467033		0.606742	0.283333	0.438889	0.427778	0.598901	0.45	0.605556	0.475309	0.578652	0.607143	0.0384615	0.284091	0.471591	0.469512	0.677778	0.662791	0.613924	0.606742	0.567416	0.625	0.588235	0.382022	0.52381	0.0714286	0.25	0.403409	0.428571	0.61236	0.317647	0.505618	0.521978	0.494505
Bilgen	0.590909	0.423077	0.390411	0.4	0.550847	0.511765	0.419753	0.423077	0.470588	0.659722	0.481707	0.634831	0.62069	0.659091	0.732143	0.730337	0.606742		0.630682	0.625	0.642045	0.0449438	0.676136	0.329545	0.594937	0.511494	0.414634	0.61236	0.598837	0.651163	0.6875	0.681818	0.666667	0.487013	0.413793	0.402299	0.33908	0.650602	0.603448	0.54878	0.61236	0.636364	0.633721	0.662921	0.350575	0.656627	0.574713	0.539326	0.483146
Cakmak	0.55	0.55303	0.587838	0.666667	0.594828	0.622093	0.585366	0.594937	0.505814	0.5	0.607143	0.357143	0.41573	0.511111	0.534884	0.543956	0.283333	0.630682		0.366667	0.426966	0.633333	0.494444	0.6	0.55	0.606742	0.636905	0.285714	0.356322	0.443182	0.450617	0.719101	0.711765	0.632911	0.589888	0.573034	0.625	0.611765	0.382022	0.488095	0.307692	0.361111	0.402299	0.461538	0.61236	0.357143	0.483146	0.532967	0.483516
Degirmi	0.522222	0.545455	0.601351	0.631944	0.567797	0.587209	0.615854	0.613924	0.52907	0.527027	0.636905	0.406593	0.44382	0.361111	0.598837	0.620879	0.438889	0.625	0.366667		0.342697	0.627778	0.372222	0.622222	0.5875	0.578652	0.619048	0.445055	0.436782	0.431818	0.420732	0.719101	0.729412	0.613924	0.606742	0.601124	0.630682	0.570588	0.370787	0.482143	0.456044	0.45	0.517241	0.357143	0.61236	0.380952	0.460674	0.456044	0.5
Gialla	0.595506	0.613636	0.641892	0.694444	0.627119	0.633721	0.646341	0.641026	0.517442	0.589041	0.674699	0.427778	0.420455	0.382022	0.6	0.622222	0.427778	0.642045	0.426966	0.342697		0.638889	0.38764	0.640449	0.6125	0.625	0.656627	0.422222	0.471264	0.3125	0.317073	0.741573	0.723529	0.658228	0.636364	0.619318	0.666667	0.613095	0.25	0.53012	0.422222	0.355556	0.482759	0.388889	0.619318	0.410714	0.511364	0.511111	0.483333
Haciserifi	0.588889	0.425373	0.42	0.416667	0.559322	0.511494	0.409639	0.424051	0.482759	0.641892	0.482143	0.631868	0.629213	0.666667	0.726744	0.725275	0.598901	0.0449438	0.633333	0.627778	0.638889		0.683333	0.344444	0.592593	0.511236	0.416667	0.604396	0.607955	0.653409	0.689024	0.694444	0.680233	0.481013	0.41573	0.421348	0.340909	0.652941	0.601124	0.547619	0.604396	0.638889	0.636364	0.67033	0.348315	0.658824	0.573034	0.521978	0.5
Halebi	0.633333	0.613636	0.648649	0.673611	0.586207	0.633721	0.640244	0.639241	0.540698	0.601351	0.714286	0.450549	0.421348	0.161111	0.622093	0.642857	0.45	0.676136	0.494444	0.372222	0.38764	0.683333		0.711111	0.64375	0.617978	0.64881	0.456044	0.454023	0.488636	0.475309	0.685393	0.694118	0.64557	0.679775	0.662921	0.676136	0.605882	0.44382	0.565476	0.445055	0.388889	0.54023	0.0384615	0.696629	0.422619	0.544944	0.543956	0.505495
Kalehghouchi	0.588889	0.393939	0.406667	0.444444	0.491525	0.476744	0.408537	0.4125	0.406977	0.635135	0.464286	0.648352	0.646067	0.688889	0.726744	0.730769	0.605556	0.329545	0.6	0.622222	0.640449	0.344444	0.711111		0.65	0.522472	0.5	0.604396	0.62069	0.676136	0.703704	0.735955	0.711765	0.481013	0.426966	0.41573	0.363636	0.611765	0.611111	0.577381	0.620879	0.65	0.614943	0.697802	0.0786517	0.642857	0.617978	0.565934	0.538462
Kaska	0.65	0.586207	0.626866	0.619048	0.560345	0.642857	0.608108	0.601449	0.551948	0.606061	0.593333	0.537037	0.56875	0.64375	0.262821	0.228395	0.475309	0.594937	0.55	0.5875	0.6125	0.592593	0.64375	0.65		0.626582	0.628378	0.493827	0.538462	0.608974	0.625	0.7375	0.720779	0.586957	0.626582	0.64557	0.615385	0.671053	0.55625	0.668919	0.487654	0.53125	0.602564	0.641975	0.64557	0.58	0.64557	0.623457	0.67284
KermanSPA	0.533708	0.431818	0.506667	0.486111	0.594828	0.534884	0.52439	0.51875	0.452941	0.623288	0.494048	0.572222	0.5625	0.595506	0.674419	0.688889	0.578652	0.511494	0.606742	0.578652	0.625	0.511236	0.617978	0.522472	0.626582		0.309524	0.588889	0.575581	0.666667	0.67284	0.681818	0.684524	0.487179	0.5	0.539773	0.545455	0.345238	0.590909	0.541667	0.566667	0.573034	0.55814	0.6	0.517045	0.564706	0.578652	0.538889	0.555556
KermanUSA	0.482143	0.338462	0.427536	0.449275	0.590909	0.481481	0.435065	0.526667	0.493827	0.635714	0.423077	0.635294	0.638554	0.660714	0.731707	0.747059	0.607143	0.414634	0.636905	0.619048	0.656627	0.416667	0.64881	0.5	0.628378	0.309524		0.623529	0.623457	0.682927	0.686667	0.650602	0.658228	0.410959	0.427711	0.481928	0.494048	0.5875	0.614458	0.531646	0.6	0.625	0.549383	0.647059	0.5	0.59375	0.542169	0.541176	0.564706
KetenGomlek	0.582418	0.544776	0.593333	0.623288	0.542373	0.591954	0.584337	0.59375	0.425287	0.526667	0.6	0.309783	0.35	0.472527	0.477011	0.478261	0.0384615	0.61236	0.285714	0.445055	0.422222	0.604396	0.456044	0.604396	0.493827	0.588889	0.623529		0.289773	0.455056	0.457317	0.688889	0.674419	0.6125	0.616667	0.566667	0.634831	0.593023	0.377778	0.535294	0.076087	0.252747	0.409091	0.434783	0.611111	0.335294	0.505556	0.543478	0.51087
Kirmizi	0.591954	0.575758	0.609589	0.607143	0.570175	0.582353	0.59375	0.596154	0.422619	0.582192	0.603659	0.238636	0.436047	0.471264	0.548193	0.556818	0.284091	0.598837	0.356322	0.436782	0.471264	0.607955	0.454023	0.62069	0.538462	0.575581	0.623457	0.289773		0.447059	0.455696	0.712644	0.708333	0.660256	0.622093	0.622093	0.623529	0.597561	0.453488	0.585366	0.289773	0.321839	0.435294	0.4375	0.626437	0.243902	0.552326	0.545455	0.517045
M3	0.619318	0.640625	0.666667	0.715278	0.706897	0.690476	0.660494	0.636364	0.571429	0.604167	0.689024	0.466292	0.436782	0.477273	0.619048	0.61236	0.471591	0.651163	0.443182	0.431818	0.3125	0.653409	0.488636	0.676136	0.608974	0.666667	0.682927	0.455056	0.447059		0.00625	0.787356	0.783133	0.679487	0.666667	0.637931	0.72093	0.638554	0.258621	0.603659	0.47191	0.410112	0.535294	0.47191	0.678161	0.457317	0.574713	0.606742	0.539326
M7	0.617284	0.644068	0.673913	0.731343	0.718182	0.724359	0.675325	0.65493	0.583333	0.576923	0.692308	0.463415	0.432099	0.481481	0.621795	0.621951	0.469512	0.6875	0.450617	0.420732	0.317073	0.689024	0.475309	0.703704	0.625	0.67284	0.686667	0.457317	0.455696	0.00625		0.790123	0.794872	0.701389	0.685185	0.6375	0.721519	0.651316	0.25625	0.6	0.47561	0.396341	0.518987	0.457317	0.70625	0.461039	0.58642	0.597561	0.54878
Male-13	0.561798	0.641791	0.66	0.638889	0.627119	0.686047	0.614458	0.628205	0.651163	0.635135	0.614458	0.705556	0.693182	0.696629	0.758824	0.755556	0.677778	0.681818	0.719101	0.719101	0.741573	0.694444	0.685393	0.735955	0.7375	0.681818	0.650602	0.688889	0.712644	0.787356	0.790123		0.0697674	0.660256	0.6875	0.710227	0.695402	0.711765	0.727273	0.475904	0.683333	0.707865	0.591954	0.694444	0.710227	0.732143	0.647727	0.6	0.622222
Male-22	0.582353	0.611111	0.647887	0.642857	0.649123	0.689024	0.604938	0.62	0.638554	0.647887	0.608434	0.69186	0.702381	0.709302	0.762195	0.744186	0.662791	0.666667	0.711765	0.729412	0.723529	0.680233	0.694118	0.711765	0.720779	0.684524	0.658228	0.674419	0.708333	0.783133	0.794872	0.0697674		0.642857	0.690476	0.720238	0.680723	0.703704	0.714286	0.462025	0.680233	0.7	0.584337	0.697674	0.690476	0.725	0.64881	0.563953	0.616279
Male-23	0.5125	0.40678	0.395522	0.484848	0.588235	0.423077	0.388889	0.427536	0.493421	0.653846	0.414474	0.65	0.621795	0.65	0.733333	0.7375	0.613924	0.487013	0.632911	0.613924	0.658228	0.481013	0.64557	0.481013	0.586957	0.487179	0.410959	0.6125	0.660256	0.679487	0.701389	0.660256	0.642857		0.443038	0.468354	0.461039	0.560811	0.608974	0.568493	0.60625	0.65	0.565789	0.63125	0.461538	0.626667	0.583333	0.5625	0.59375
Male-7	0.527778	0.373134	0.386667	0.4375	0.570175	0.441176	0.341463	0.352564	0.505882	0.616438	0.369048	0.672222	0.647727	0.662921	0.729412	0.744444	0.606742	0.413793	0.589888	0.606742	0.636364	0.41573	0.679775	0.426966	0.626582	0.5	0.427711	0.616667	0.622093	0.666667	0.685185	0.6875	0.690476	0.443038		0.420455	0.333333	0.60119	0.636364	0.560241	0.633333	0.662921	0.587209	0.666667	0.431818	0.642857	0.579545	0.588889	0.577778
Mumtaz	0.52809	0.5	0.424658	0.492958	0.577586	0.505814	0.5	0.442308	0.511765	0.59589	0.475904	0.616667	0.579545	0.651685	0.711765	0.722222	0.567416	0.402299	0.573034	0.601124	0.619318	0.421348	0.662921	0.41573	0.64557	0.539773	0.481928	0.566667	0.622093	0.637931	0.6375	0.710227	0.720238	0.468354	0.420455		0.488506	0.619048	0.579545	0.542169	0.594444	0.601124	0.591954	0.638889	0.431818	0.620482	0.545455	0.55	0.561111
Ohadi	0.568182	0.416667	0.356164	0.366197	0.516949	0.517647	0.277778	0.335443	0.458333	0.673611	0.335366	0.668539	0.66092	0.670455	0.729412	0.730337	0.625	0.33908	0.625	0.630682	0.666667	0.340909	0.676136	0.363636	0.615385	0.545455	0.494048	0.634831	0.623529	0.72093	0.721519	0.695402	0.680723	0.461039	0.333333	0.488506		0.608434	0.643678	0.614458	0.634831	0.659091	0.658824	0.662921	0.356322	0.650602	0.591954	0.561798	0.567416
Peters	0.570588	0.53125	0.564286	0.594203	0.705357	0.58642	0.583333	0.547297	0.52439	0.65	0.582278	0.598837	0.582353	0.570588	0.685185	0.69186	0.588235	0.650602	0.611765	0.570588	0.613095	0.652941	0.605882	0.611765	0.671053	0.345238	0.5875	0.593023	0.597561	0.638554	0.651316	0.711765	0.703704	0.560811	0.60119	0.619048	0.608434		0.607143	0.588608	0.581395	0.594118	0.585366	0.598837	0.625	0.582278	0.647059	0.616279	0.633721
RedAleppo	0.533708	0.592308	0.621622	0.690141	0.627119	0.658824	0.592593	0.588608	0.505882	0.534247	0.626506	0.416667	0.386364	0.44382	0.547059	0.577778	0.382022	0.603448	0.382022	0.370787	0.25	0.601124	0.44382	0.611111	0.55625	0.590909	0.614458	0.377778	0.453488	0.258621	0.25625	0.727273	0.714286	0.608974	0.636364	0.579545	0.643678	0.607143		0.487952	0.4	0.404494	0.488372	0.427778	0.602273	0.445783	0.534091	0.527778	0.516667
Sefidi	0.386905	0.507812	0.514493	0.604478	0.556604	0.561728	0.539474	0.533333	0.5125	0.373239	0.538462	0.547059	0.512048	0.577381	0.685185	0.711765	0.52381	0.54878	0.488095	0.482143	0.53012	0.547619	0.565476	0.577381	0.668919	0.541667	0.531646	0.535294	0.585366	0.603659	0.6	0.475904	0.462025	0.568493	0.560241	0.542169	0.614458	0.588608	0.487952		0.541176	0.571429	0.388889	0.576471	0.576471	0.582278	0.433735	0.388235	0.411765
Selection-10	0.576923	0.552239	0.573333	0.623288	0.533898	0.568966	0.572289	0.58125	0.408046	0.546667	0.6	0.293478	0.372222	0.450549	0.465517	0.467391	0.0714286	0.61236	0.307692	0.456044	0.422222	0.604396	0.445055	0.620879	0.487654	0.566667	0.6	0.076087	0.289773	0.47191	0.47561	0.683333	0.680233	0.60625	0.633333	0.594444	0.634831	0.581395	0.4	0.541176		0.236264	0.375	0.429348	0.611111	0.317647	0.505556	0.538043	0.516304
Selection-11	0.566667	0.598485	0.628378	0.664384	0.59322	0.627907	0.609756	0.613924	0.436047	0.574324	0.625	0.340659	0.348315	0.394444	0.517442	0.527473	0.25	0.636364	0.361111	0.45	0.355556	0.638889	0.388889	0.65	0.53125	0.573034	0.625	0.252747	0.321839	0.410112	0.396341	0.707865	0.7	0.65	0.662921	0.601124	0.659091	0.594118	0.404494	0.571429	0.236264		0.45977	0.384615	0.646067	0.303571	0.477528	0.532967	0.510989
Selection-12	0.482759	0.538462	0.527778	0.594203	0.535714	0.559524	0.56875	0.572368	0.47619	0.333333	0.555556	0.340909	0.5	0.586207	0.60241	0.607955	0.403409	0.633721	0.402299	0.517241	0.482759	0.636364	0.54023	0.614943	0.602564	0.55814	0.549383	0.409091	0.435294	0.535294	0.518987	0.591954	0.584337	0.565789	0.587209	0.591954	0.658824	0.585366	0.488372	0.388889	0.375	0.45977		0.539773	0.610465	0.445122	0.447674	0.465909	0.534091
Selection-13	0.631868	0.589552	0.633333	0.657534	0.567797	0.632184	0.644578	0.63125	0.54023	0.6	0.705882	0.440217	0.4	0.186813	0.62069	0.641304	0.428571	0.662921	0.461538	0.357143	0.388889	0.67033	0.0384615	0.697802	0.641975	0.6	0.647059	0.434783	0.4375	0.47191	0.457317	0.694444	0.697674	0.63125	0.666667	0.638889	0.662921	0.598837	0.427778	0.576471	0.429348	0.384615	0.539773		0.688889	0.405882	0.527778	0.527174	0.483696
Selection-14	0.578652	0.424242	0.376712	0.450704	0.447368	0.452941	0.376543	0.373418	0.376471	0.641892	0.445783	0.633333	0.636364	0.674157	0.735294	0.738889	0.61236	0.350575	0.61236	0.61236	0.619318	0.348315	0.696629	0.0786517	0.64557	0.517045	0.5	0.611111	0.626437	0.678161	0.70625	0.710227	0.690476	0.461538	0.431818	0.431818	0.356322	0.625	0.602273	0.576471	0.611111	0.646067	0.610465	0.688889		0.650602	0.602273	0.544444	0.522222
Selection-15	0.605882	0.561538	0.618056	0.619403	0.583333	0.640244	0.589744	0.646667	0.425926	0.578571	0.651899	0.282353	0.433735	0.446429	0.560976	0.564706	0.317647	0.656627	0.357143	0.380952	0.410714	0.658824	0.422619	0.642857	0.58	0.564706	0.59375	0.335294	0.243902	0.457317	0.461039	0.732143	0.725	0.626667	0.642857	0.620482	0.650602	0.582278	0.445783	0.582278	0.317647	0.303571	0.445122	0.405882	0.650602		0.47619	0.523529	0.452941
Selection-16	0.477528	0.507692	0.554054	0.590278	0.561404	0.535294	0.560976	0.575949	0.517647	0.438356	0.529762	0.505556	0.438202	0.516854	0.664706	0.677778	0.505618	0.574713	0.483146	0.460674	0.511364	0.573034	0.544944	0.617978	0.64557	0.578652	0.542169	0.505556	0.552326	0.574713	0.58642	0.647727	0.64881	0.583333	0.579545	0.545455	0.591954	0.647059	0.534091	0.433735	0.505556	0.477528	0.447674	0.527778	0.602273	0.47619		0.405556	0.433333
Selection-2	0.527473	0.507463	0.54	0.582192	0.584746	0.545977	0.566265	0.56875	0.482759	0.54	0.523529	0.521739	0.533333	0.554945	0.683908	0.684783	0.521978	0.539326	0.532967	0.456044	0.511111	0.521978	0.543956	0.565934	0.623457	0.538889	0.541176	0.543478	0.545455	0.606742	0.597561	0.6	0.563953	0.5625	0.588889	0.55	0.561798	0.616279	0.527778	0.388235	0.538043	0.532967	0.465909	0.527174	0.544444	0.523529	0.405556		0.347826
Selection-3	0.576923	0.544776	0.533333	0.582192	0.601695	0.557471	0.584337	0.58125	0.482759	0.58	0.6	0.527174	0.511111	0.489011	0.712644	0.717391	0.494505	0.483146	0.483516	0.5	0.483333	0.5	0.505495	0.538462	0.67284	0.555556	0.564706	0.51087	0.517045	0.539326	0.54878	0.622222	0.616279	0.59375	0.577778	0.561111	0.567416	0.633721	0.516667	0.411765	0.516304	0.510989	0.534091	0.483696	0.522222	0.452941	0.433333	0.347826
Selection-4	0.368132	0.492537	0.48	0.554795	0.525424	0.557471	0.536145	0.51875	0.5	0.386667	0.541176	0.548913	0.511111	0.571429	0.689655	0.706522	0.527473	0.544944	0.494505	0.467033	0.544444	0.56044	0.565934	0.576923	0.660494	0.55	0.517647	0.543478	0.585227	0.617978	0.615854	0.477778	0.476744	0.55625	0.544444	0.544444	0.573034	0.598837	0.494444	0.0705882	0.538043	0.571429	0.380682	0.565217	0.572222	0.558824	0.388889	0.38587	0.391304
Selection-5	0.373626	0.492537	0.48	0.554795	0.533898	0.563218	0.542169	0.525	0.505747	0.38	0.541176	0.554348	0.516667	0.576923	0.683908	0.706522	0.527473	0.544944	0.489011	0.472527	0.538889	0.56044	0.56044	0.576923	0.660494	0.55	0.517647	0.543478	0.590909	0.617978	0.615854	0.483333	0.47093	0.55	0.544444	0.544444	0.573034	0.598837	0.488889	0.0647059	0.543478	0.571429	0.386364	0.559783	0.577778	0.558824	0.394444	0.38587	0.391304
Selection-6	0.483333	0.559701	0.566667	0.618056	0.525424	0.597701	0.596386	0.575949	0.54023	0.358108	0.625	0.467033	0.533708	0.566667	0.47093	0.494505	0.445055	0.606742	0.494444	0.494444	0.511111	0.598901	0.566667	0.638889	0.506173	0.58427	0.613095	0.461538	0.556818	0.607955	0.609756	0.622222	0.622093	0.639241	0.617978	0.629213	0.602273	0.623529	0.522472	0.369048	0.461538	0.5	0.454545	0.571429	0.629213	0.547059	0.522472	0.510989	0.516484
Selection-7	0.549451	0.574627	0.6	0.657534	0.559322	0.58046	0.596386	0.6	0.41954	0.486667	0.623529	0.0434783	0.433333	0.472527	0.511494	0.521739	0.28022	0.617978	0.32967	0.379121	0.416667	0.615385	0.456044	0.637363	0.518519	0.561111	0.623529	0.293478	0.210227	0.455056	0.445122	0.7	0.686047	0.63125	0.644444	0.6	0.651685	0.587209	0.4	0.541176	0.282609	0.324176	0.323864	0.434783	0.633333	0.252941	0.477778	0.494565	0.51087
Selection-8	0.5625	0.583333	0.616438	0.657143	0.578947	0.611765	0.62963	0.589744	0.447059	0.59589	0.634146	0.331461	0.356322	0.4375	0.541667	0.533708	0.191011	0.655172	0.340909	0.431818	0.397727	0.651685	0.409091	0.659091	0.531646	0.557471	0.640244	0.207865	0.293103	0.453488	0.4625	0.710227	0.702381	0.616883	0.637931	0.586207	0.662791	0.554217	0.396552	0.559524	0.202247	0.210227	0.447674	0.382022	0.651685	0.331325	0.494253	0.511236	0.505618
Selection-9	0.590361	0.548387	0.57971	0.615942	0.563636	0.575949	0.573333	0.575342	0.425926	0.536765	0.603896	0.291667	0.365854	0.451807	0.462025	0.470238	0.0542169	0.617284	0.307229	0.457831	0.426829	0.608434	0.451807	0.638554	0.47973	0.579268	0.608974	0.0833333	0.275	0.475309	0.48	0.689024	0.685897	0.631944	0.640244	0.597561	0.648148	0.582278	0.396341	0.545455	0.0238095	0.23494	0.36875	0.434524	0.640244	0.324675	0.518293	0.541667	0.547619
Sfax	0.581633	0.6	0.6	0.618421	0.680556	0.659574	0.611111	0.621951	0.586957	0.728571	0.648936	0.489796	0.489796	0.5	0.652174	0.673469	0.489796	0.645833	0.540816	0.469388	0.479592	0.653061	0.44898	0.663265	0.663265	0.638298	0.630952	0.489796	0.520833	0.5625	0.5625	0.708333	0.677083	0.585106	0.653061	0.595745	0.659574	0.666667	0.469388	0.583333	0.5	0.479592	0.630435	0.459184	0.638298	0.488889	0.5625	0.520408	0.55102
Siirt	0.383721	0.515385	0.493243	0.572464	0.535088	0.565476	0.55	0.532468	0.524096	0.401408	0.530864	0.545977	0.494118	0.569767	0.686747	0.701149	0.522989	0.541176	0.494186	0.482759	0.534884	0.557471	0.546512	0.581395	0.649351	0.557471	0.512346	0.534483	0.607143	0.613095	0.61875	0.476744	0.463415	0.519737	0.547059	0.541176	0.564706	0.58642	0.5	0.0864198	0.534483	0.563953	0.380952	0.545977	0.558824	0.566265	0.418605	0.425287	0.408046
Sirora	0.55	0.462121	0.472973	0.472222	0.567797	0.55814	0.487805	0.518987	0.44186	0.574324	0.517857	0.554945	0.47191	0.511111	0.627907	0.620879	0.488889	0.448864	0.472222	0.511111	0.533708	0.455556	0.533333	0.511111	0.575	0.550562	0.517857	0.505495	0.5	0.551136	0.555556	0.651685	0.641176	0.544304	0.52809	0.488764	0.528409	0.605882	0.505618	0.488095	0.505495	0.516667	0.557471	0.527473	0.511236	0.488095	0.421348	0.472527	0.483516
Sivri	0.566667	0.507576	0.533784	0.569444	0.567797	0.552326	0.566265	0.556962	0.55814	0.64	0.582353	0.587912	0.52809	0.527778	0.718391	0.736264	0.572222	0.5	0.561111	0.505556	0.533708	0.505556	0.538889	0.561111	0.703704	0.55618	0.547619	0.582418	0.58046	0.585227	0.604938	0.601124	0.598837	0.601266	0.52809	0.550562	0.505682	0.6	0.578652	0.452381	0.60989	0.583333	0.609195	0.521978	0.55618	0.547619	0.505618	0.423077	0.412088
Sultani	0.573034	0.553846	0.589041	0.605634	0.551724	0.605882	0.580247	0.583333	0.405882	0.547945	0.60241	0.327778	0.352273	0.455056	0.494118	0.483333	0.117978	0.609195	0.294444	0.398876	0.448864	0.606742	0.44382	0.623596	0.5	0.573864	0.626506	0.122222	0.267442	0.442529	0.45	0.693182	0.690476	0.615385	0.630682	0.579545	0.637931	0.577381	0.392045	0.536145	0.15	0.275281	0.418605	0.422222	0.625	0.319277	0.482955	0.55	0.533333
T.Silvana	0.55814	0.601562	0.611111	0.666667	0.592593	0.608434	0.62987	0.641892	0.487654	0.485714	0.696203	0.424419	0.39881	0.435294	0.580247	0.598837	0.429412	0.638554	0.441176	0.388235	0.270588	0.635294	0.405882	0.641176	0.626667	0.589286	0.613924	0.424419	0.451807	0.321429	0.311688	0.720238	0.725	0.61875	0.635294	0.625	0.686747	0.56875	0.232143	0.493671	0.430233	0.389535	0.457317	0.424419	0.625	0.425926	0.494048	0.523256	0.505814
Tekin	0.372222	0.507463	0.493333	0.5625	0.550847	0.568966	0.542169	0.518987	0.528736	0.378378	0.529762	0.565934	0.505618	0.583333	0.680233	0.708791	0.538462	0.533708	0.494444	0.477778	0.538889	0.549451	0.572222	0.561111	0.666667	0.544944	0.52381	0.549451	0.590909	0.602273	0.603659	0.488889	0.482558	0.563291	0.52809	0.533708	0.573864	0.605882	0.494382	0.047619	0.56044	0.577778	0.392045	0.571429	0.567416	0.570588	0.404494	0.39011	0.406593
Uygur	0.703488	0.706349	0.715278	0.731884	0.453704	0.72561	0.683544	0.701299	0.608434	0.542254	0.72561	0.522989	0.588235	0.639535	0.0180723	0.0229885	0.47093	0.738095	0.546512	0.610465	0.617647	0.732558	0.639535	0.726744	0.236842	0.686047	0.73125	0.482759	0.560241	0.60119	0.602564	0.752941	0.759259	0.746667	0.741176	0.729412	0.732143	0.697531	0.570588	0.703704	0.471264	0.523256	0.608434	0.637931	0.735294	0.555556	0.69186	0.695402	0.718391
Uzun	0.579545	0.544776	0.574324	0.633803	0.535088	0.570588	0.574074	0.576923	0.39881	0.534247	0.60241	0.286517	0.367816	0.443182	0.470588	0.477528	0.0568182	0.616279	0.301136	0.443182	0.41954	0.607955	0.448864	0.607955	0.5	0.568182	0.596386	0.0674157	0.3	0.453488	0.4625	0.695402	0.674699	0.597403	0.619318	0.586207	0.643678	0.584337	0.37931	0.53012	0.0393258	0.255682	0.382353	0.432584	0.597701	0.315476	0.5	0.533708	0.5
Vahidi	0.488764	0.454545	0.412162	0.472222	0.601695	0.52907	0.445122	0.423077	0.534884	0.568493	0.433735	0.638889	0.579545	0.646067	0.711765	0.722222	0.583333	0.448864	0.595506	0.595506	0.683333	0.461111	0.640449	0.505618	0.64375	0.5	0.445783	0.566667	0.603448	0.693182	0.70122	0.646067	0.647059	0.424051	0.4375	0.420455	0.5	0.565476	0.630682	0.5	0.6	0.611111	0.586207	0.627778	0.488636	0.630952	0.556818	0.572222	0.566667
WhiteOleimy	0.563218	0.538462	0.576389	0.615942	0.587719	0.642857	0.594937	0.589744	0.524096	0.541667	0.641975	0.482955	0.360465	0.327586	0.583333	0.607955	0.436782	0.611765	0.448276	0.386364	0.412791	0.62069	0.33908	0.632184	0.603896	0.603448	0.628049	0.448864	0.435294	0.447059	0.449367	0.697674	0.713415	0.657895	0.633721	0.610465	0.610465	0.603659	0.447674	0.511905	0.443182	0.37931	0.541667	0.346591	0.625	0.390244	0.482558	0.528409	0.477273
[truncated: 19 more columns]

## Sheet: Supplementary Table-3
Supplementary Table 3. Distribution frequency of cultivar specific SSR alleles in different pistachio cultivars.
No	Locus	Allele/n	Allele Frequency	Amplified cultivar
1	CUPSiOh2985	186	0.008	Sel-6
2	CUPSiOh3660	124	0.008	W.Oleimy
		126	0.008	Ajamy
3	CUPSiBa613	139	0.008	Sivri
4	CUPBaPa667	180	0.008	Sel-16
5	CUPSiOh4341	188	0.009	Atli
6	CUPSiOh2390	136	0.008	T.Silvana
		154	0.008	T.Silvana
7	CUPSiPa3520	189	0.009	Vahidi
8	CUPOhBa1592	148	0.01	Red Aleppo
		156	0.01	Vahidi
		160	0.01	Sultani
		161	0.01	Peters
		166	0.01	Degirmi
		178	0.01	Sfax
9	CUPOhPa1527	145	0.008	Male-22
10	CUPSiPa3929	122	0.009	21-125
11	CUPSiOh4074	171	0.008	Vahidi
12	CUPSiBa1817	163	0.008	2021-02-12
		188	0.008	Sel-12
13	CUPBaPa1791	135	0.008	Mumtaz
14	CUPBaPa1606	220	0.009	Kerman USA
		221	0.009	T.Silvana
		233	0.009	Aeginea
		240	0.009	Sivri
15	CUPSiPa1215	175	0.008	Sultani
		183	0.008	Sfax
		196	0.008	Sfax
16	CUPSiBa1265	178	0.008	Kerman SPA
		180	0.008	Male-22
17	CupSiBa1131	217	0.008	Bagyolu
18	CUPSiPa3096	148	0.008	12-2
19	CUPSiOh216	148	0.008	Vahidi
20	CUPSiOh2679	101	0.008	Sel-16
21	CUPSiOh1818	167	0.008	Sel-15
22	CUPSiOh3822	174	0.008	19-112
23	CUPSiOh527	194	0.009	Sefidi
24	CUPSiOh810	149	0.008	Male-13
25	CUPSiOh3348	126	0.008	Halebi
26	CUPSiOh196	185	0.008	Male-22
27	CUPSiPa4715	158	0.008	Haciserifi
28	CUPOhPa3361	229	0.008	Bilgen
29	CUPSiOh4004	143	0.008	Vahidi
30	CUPSiPa912	126	0.008	Kerman USA
31	CUPSiOh4057	202	0.008	Peters
32	CUPSiOh3920	170	0.008	Peters
33	CUPSiPa2132	170	0.008	25-90
		171	0.008	Sel-6
34	CUPOhBa2127	154	0.008	Sirora
		162	0.008	Mumtaz
		168	0.008	Sirora
		178	0.008	Siirt
35	CUPSiOh2460	171	0.008	19-112
36	CUPSiOh3593	178	0.012	Kerman USA
37	CUPSiPa694	134	0.008	Vahidi
38	CUPSiOh1913	197	0.008	Male-22
39	CUPVEST1747	190	0.008	Sel-2
40	CUPVEST2697	126	0.008	Kaska
41	CUPVEST2789	162	0.009	Sirora
42	CUPVEST3504	178	0.008	Bagyolu
43	CUPVEST704	163	0.008	Kerman SPA
